# Supplementary material for: Highly efficient flexible quantum-dot light emitting diodes with an ITO/Ag/ITO cathode
Source: Royal Society of Chemistry journal article supplement (doi:10.1039/c7tc00514h), 2017-01-01
Supplement: c7tc00514h1.pdf [file c7tc00514h1.pdf]

**Supporting Information for**

**Highly efficient flexible quantum-dot light emitting diodes  
with an ITO/Ag/ITO cathode**

**Wenyu Ji,<sup>\*a,c</sup> Ting Wang,<sup>a</sup> Bingyan Zhu,<sup>a</sup> Han Zhang,<sup>a</sup> Rong Wang,<sup>a</sup> Dandan Zhang,<sup>b</sup>  
Liezun Chen,<sup>d</sup> Qingyi Yang,<sup>d</sup> and Hanzhuang Zhang<sup>\*a,c</sup>**

*<sup>a</sup>Department of Physics, Jilin University, Changchun, 130023, China*

*E-mail: [jiwy@jlu.edu.cn](mailto:jiwy@jlu.edu.cn); [zhanghz@jlu.edu.cn](mailto:zhanghz@jlu.edu.cn);*

*<sup>b</sup>Jiangsu Key Laboratory for Carbon-Based Functional Materials and Devices, Institute of  
Functional Nano and Soft Materials (FUNSOM), Soochow University, Suzhou 215123, China*

*<sup>c</sup>Key Lab of Physics and Technology for Advanced Batteries (Ministry of Education) Jilin  
University, Changchun, 130023, China*

*<sup>d</sup>Hunan Provincial Applied Basic Research Base of Optoelectronic Information Technology,  
College of Physics and Electronic Engineering, Hengyang Normal University, Hengyang 421008,  
China*

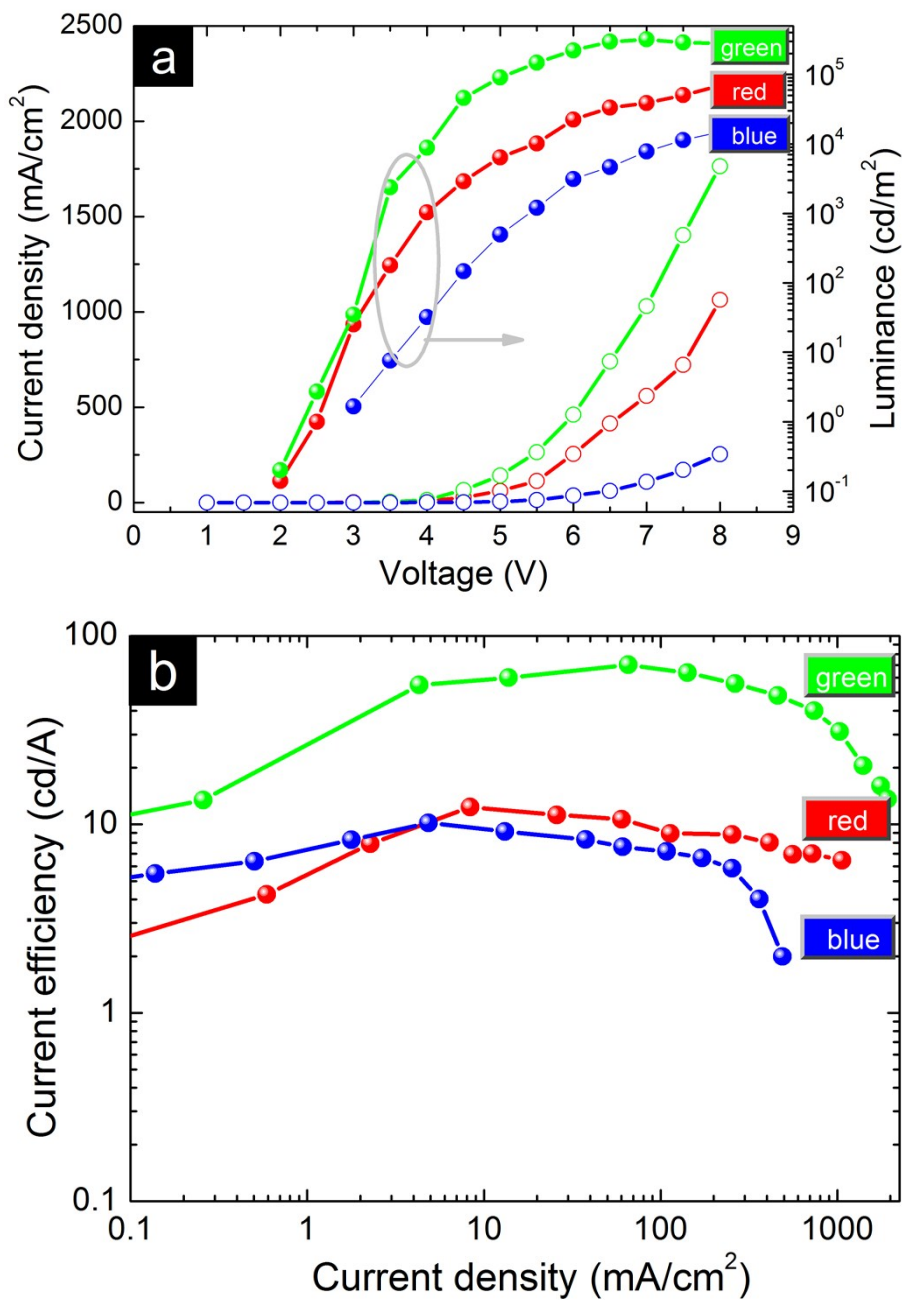

Figure S1. (a) Current density-voltage-luminance and (b) current density-efficiency properties for RGB QLEDs with glass/ITO as the cathodes

Figure S1 shows the optical-electrical characteristics of the glass/ITO based QLEDs. We can see that the maximum current efficiencies of 12.3, 65.5, and 10.2  $\text{cd}/\text{A}$  are obtained for RGB QLEDs, respectively, with the peak luminance of 68580, 319768, and 14820  $\text{cd}/\text{m}^2$  for corresponding devices. It is worth to noting that the performances of glass/ITO based devices are all lower than that of flexible device

with PET/IAI cathodes. The turn-on voltages (the turn-on voltage is defined as the voltage under which the device luminance is 1 cd/m<sup>2</sup>) are approximate 2.2, 2.4 and 2.9 V for RGB QLEDs, respectively, which are similar to that of PET/IAI based devices due to the good electron injection and transport capability of ZnO layer.
